# Supplementary material for: Evaluation of the Spermatogenic Activity of Polyherbal Formulation in Oligospermic Males
Source: PubMed Central journal article supplement (PMC6083514; doi:10.1155/2018/2070895), 2018-07-25

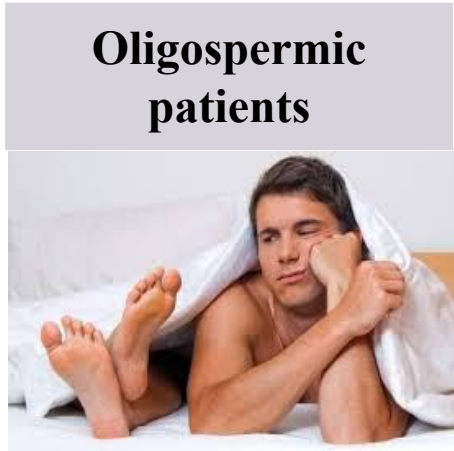

**Placebo group  
n=13**

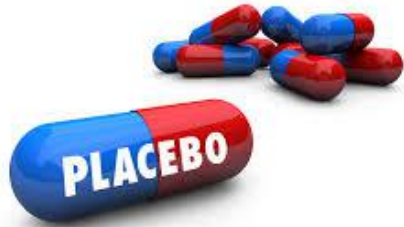

**Doses**  
750mg/day in  
3 doses  
No Bioactive  
compounds

**Effect  
(After 3 months)**

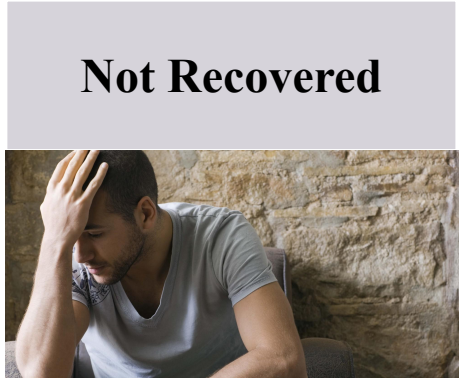

**Polyherbal  
Formulation  
Treated n=23**

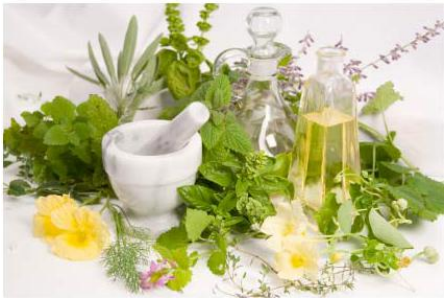

750mg/day in  
3 doses

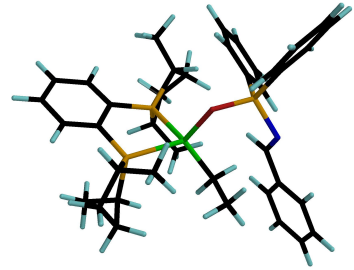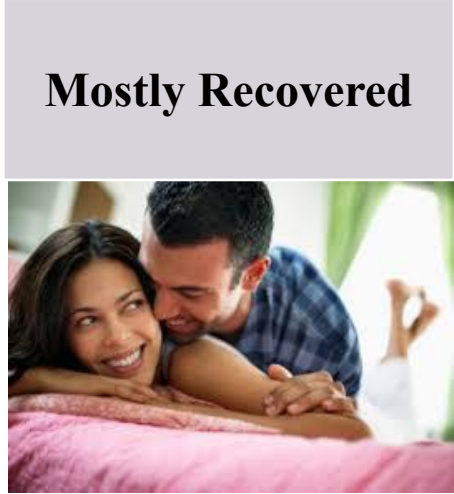

Supplement: 2070895.f1.pdf [file 2070895.f1.pdf]
